# Supplementary material
Source: PubMed Central journal article supplement (PMC8244582)

# All Highly Expressed miRNAs

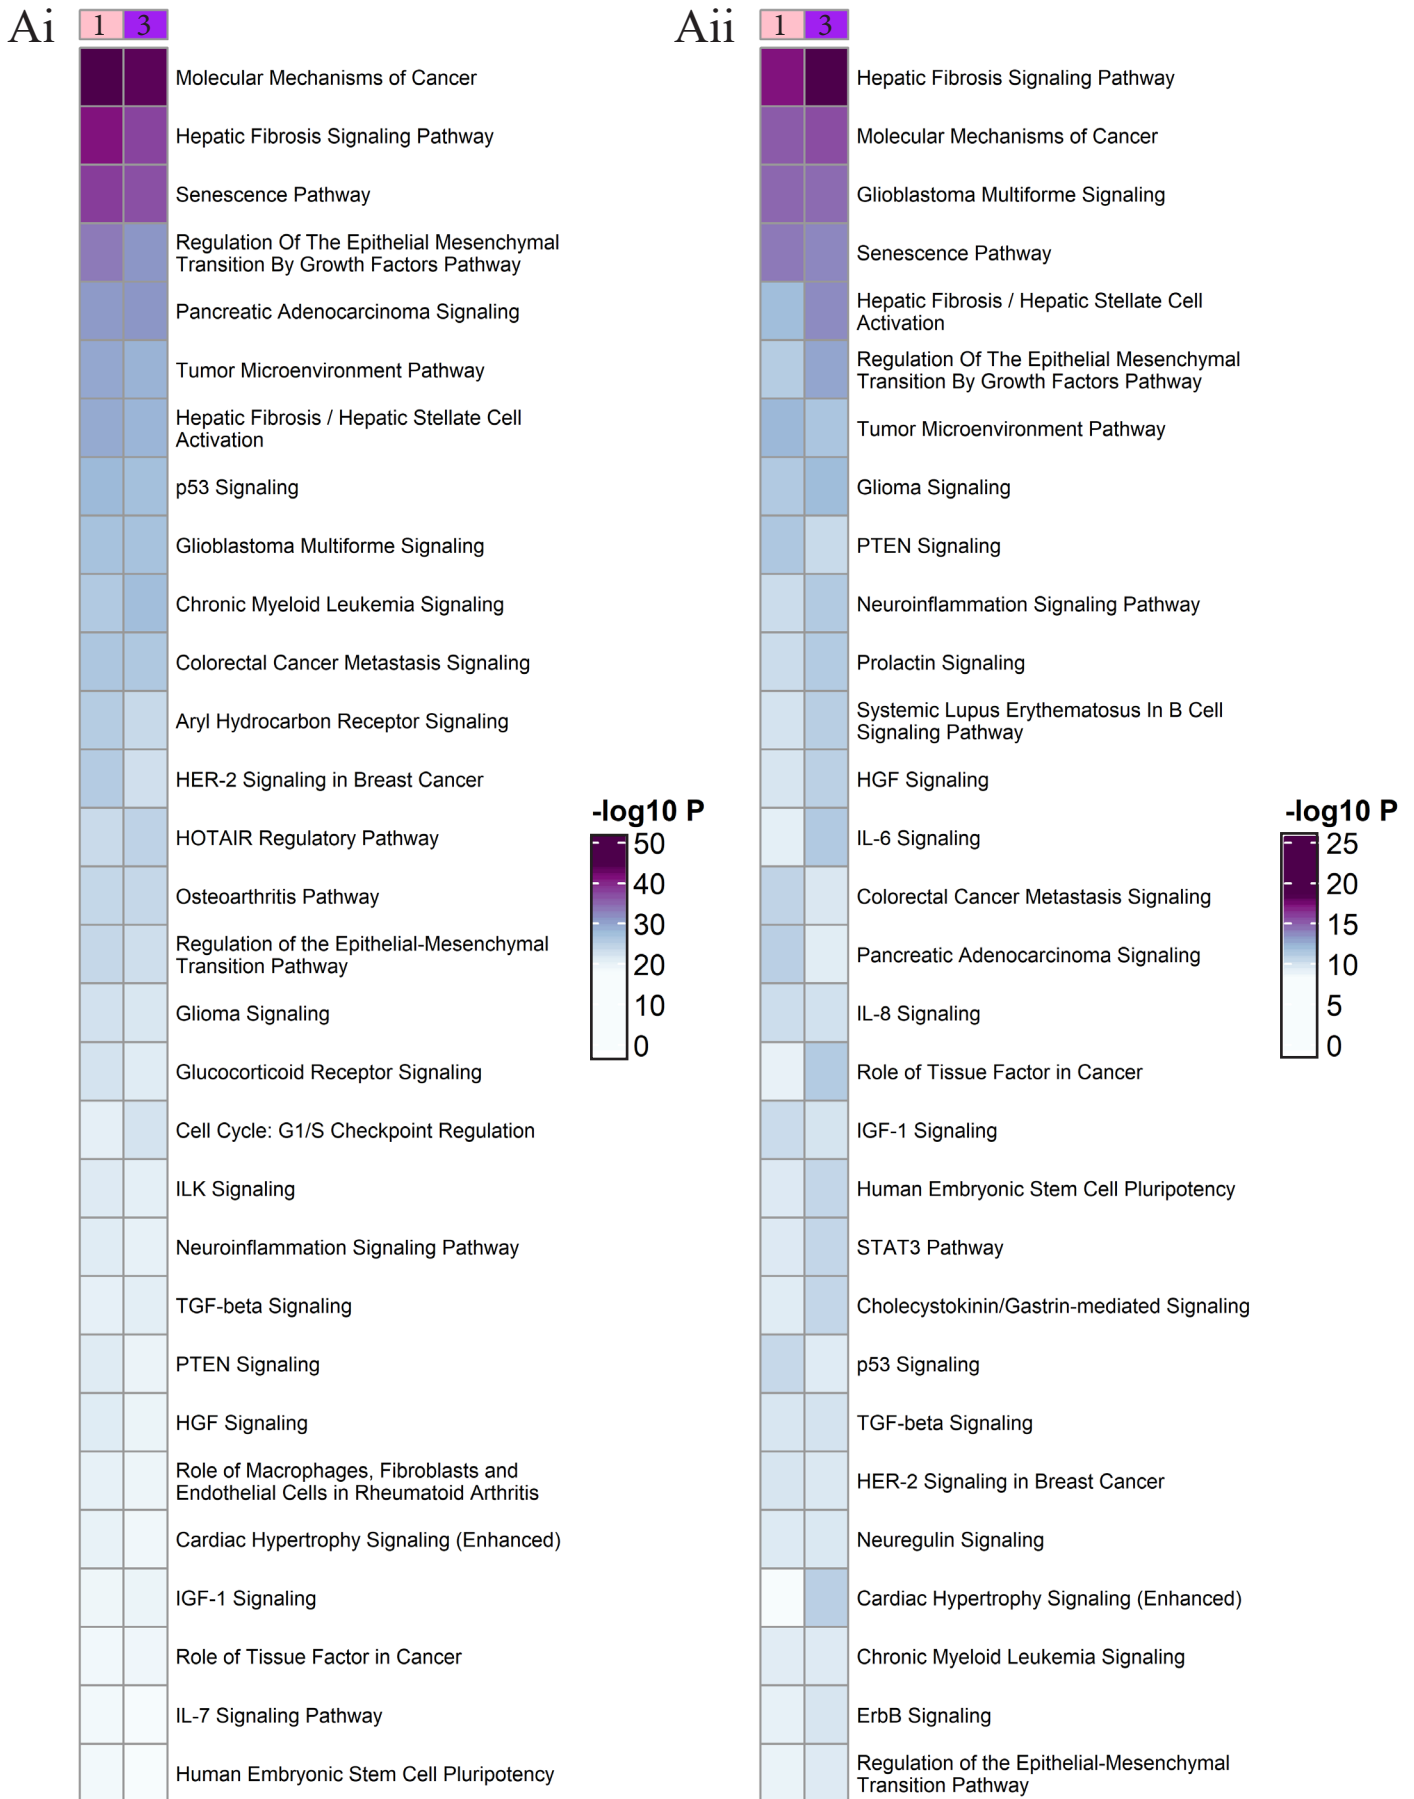

# Similarly and Differentially Expressed miRNAs

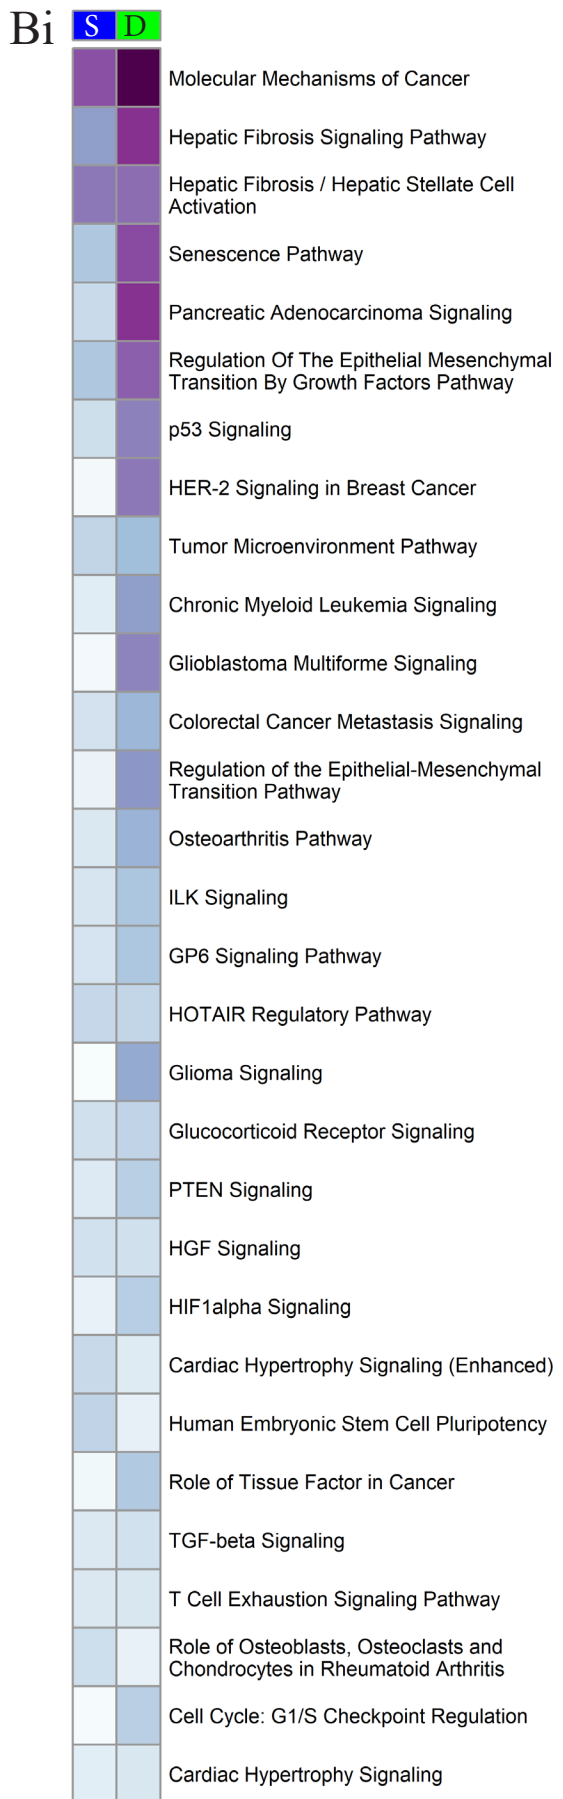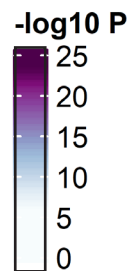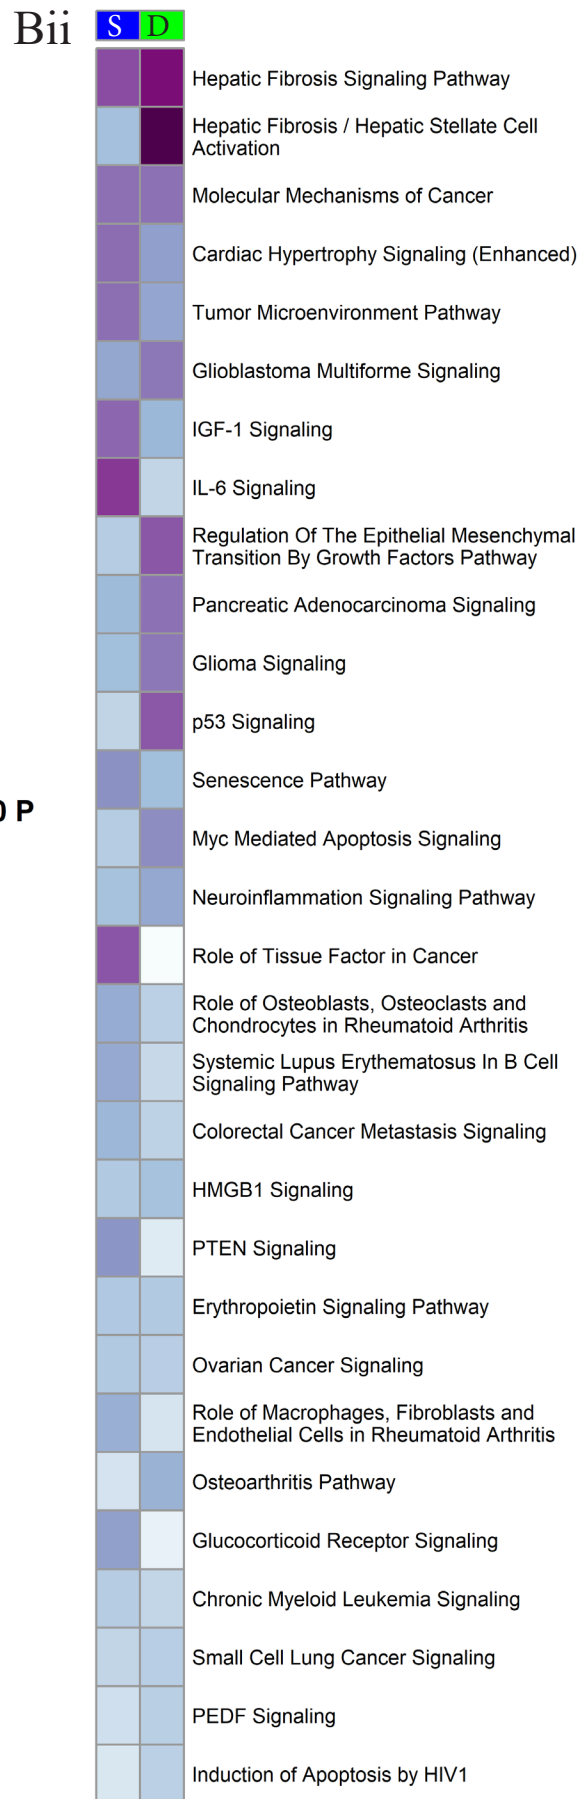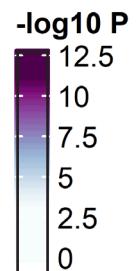

# C14MC Expressed miRNAs

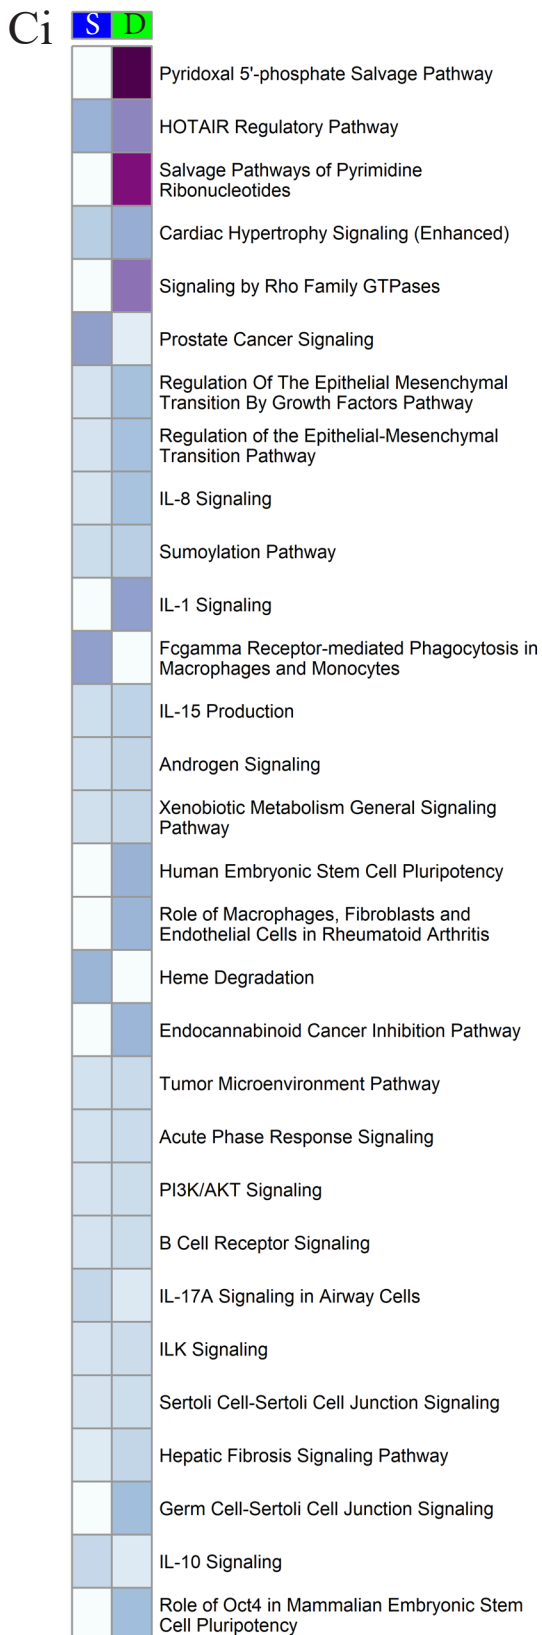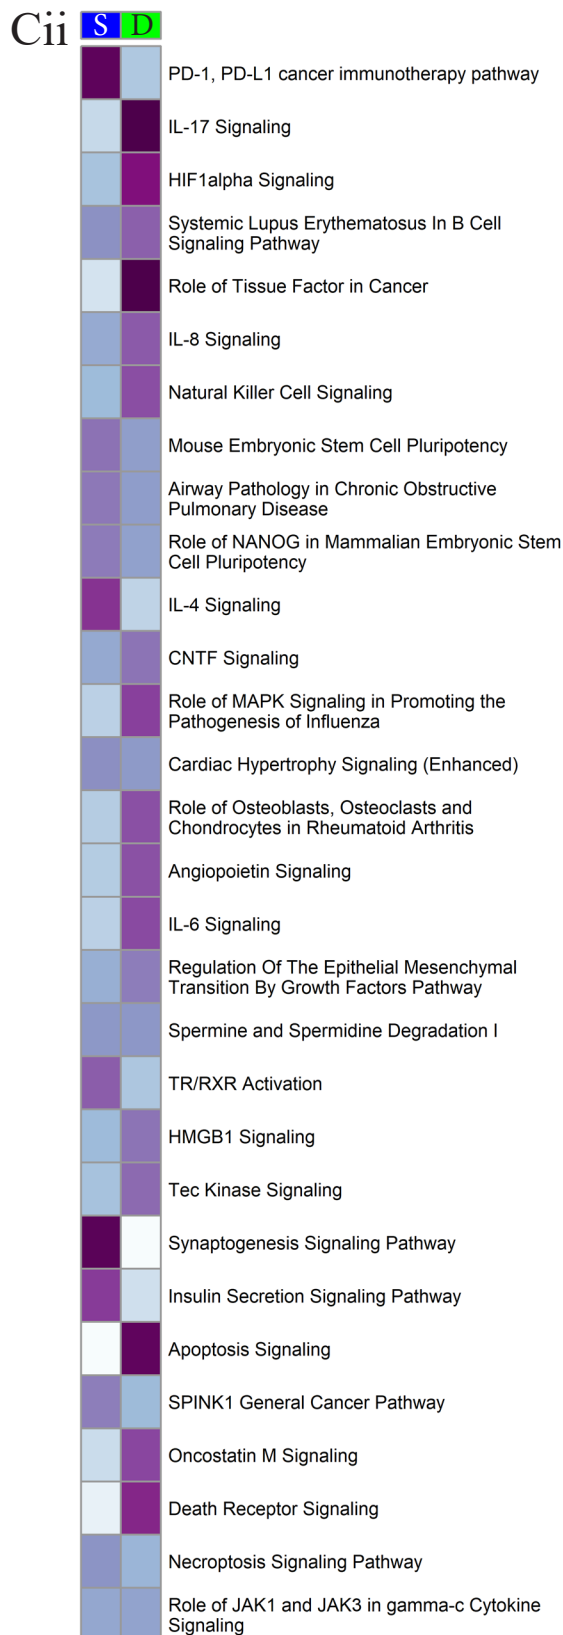

# C19MC Expressed miRNAs

Di **S** **D**

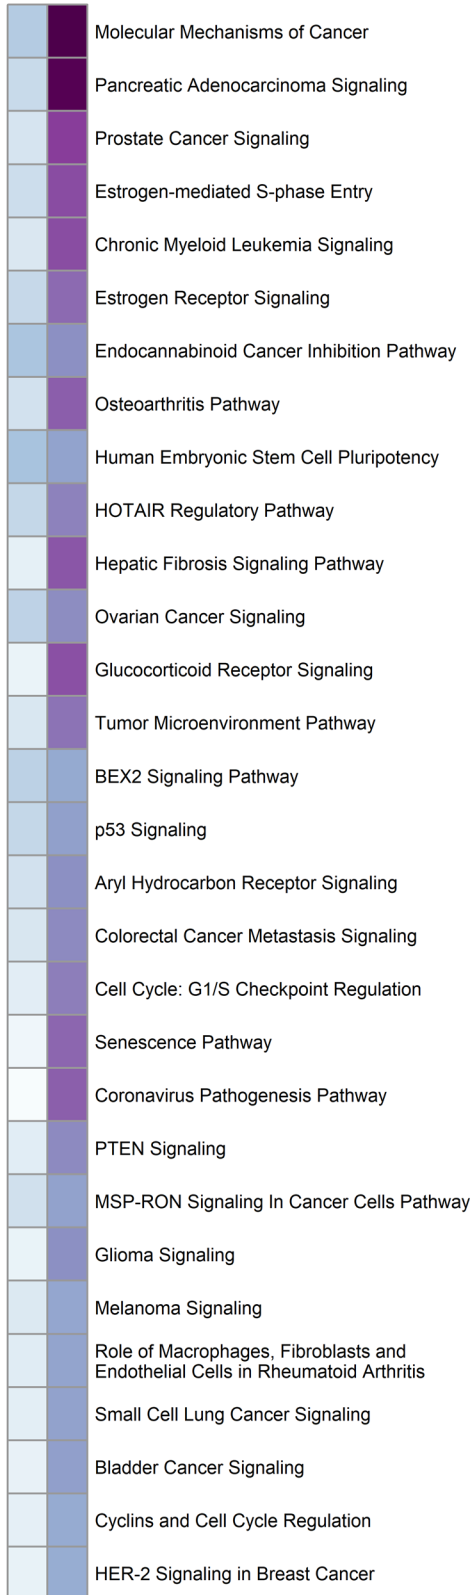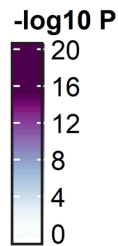

Dii **S** **D**

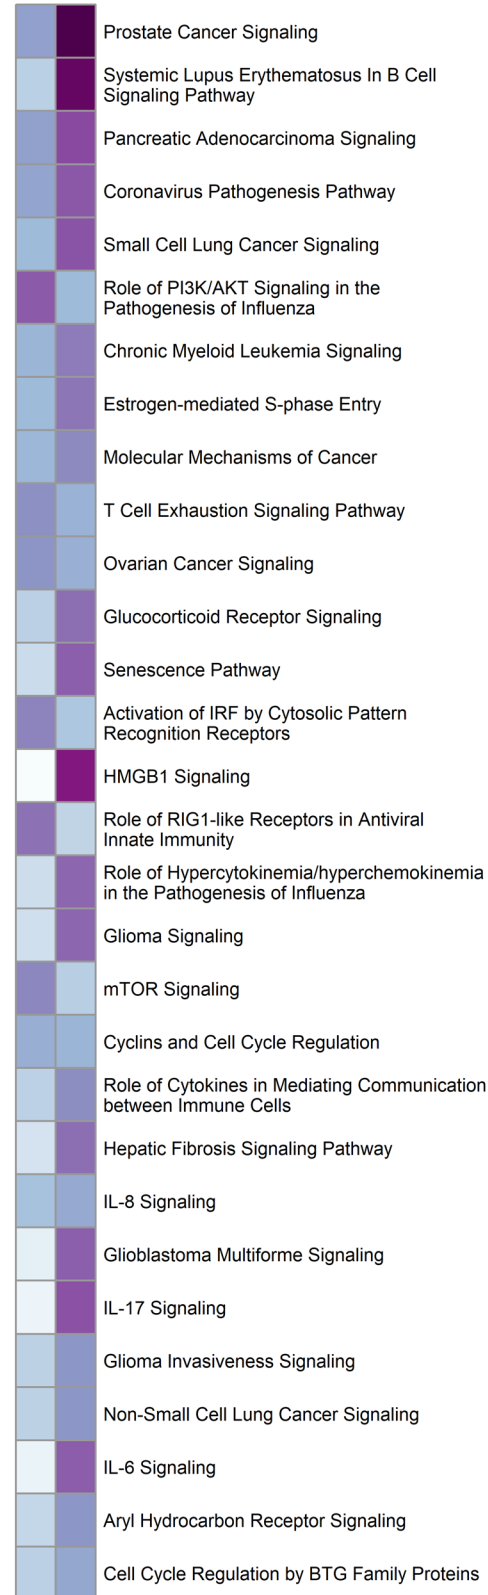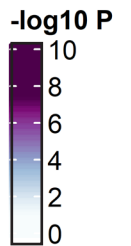

Supplement: epi-13-995-s4.pdf [file epi-13-995-s4.pdf]
