# Supplementary material
Source: PubMed Central journal article supplement (PMC8244582)

## Supplemental File 5: Within-chromosome distribution of miRNAs.

Expressed at baseMean>10. Small points only reach the threshold in one group or the other.

Upregulated ● First Trimester, ▲ Third Trimester, □ Not Significant

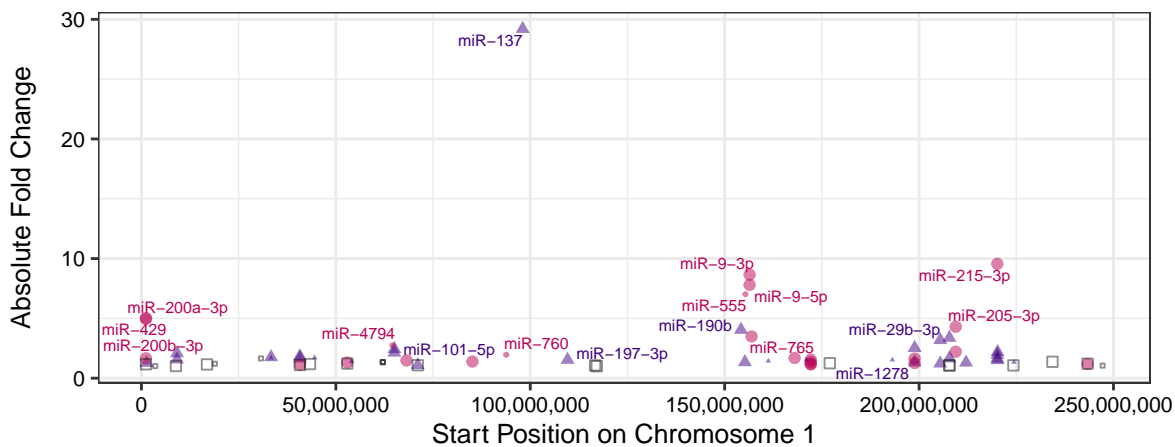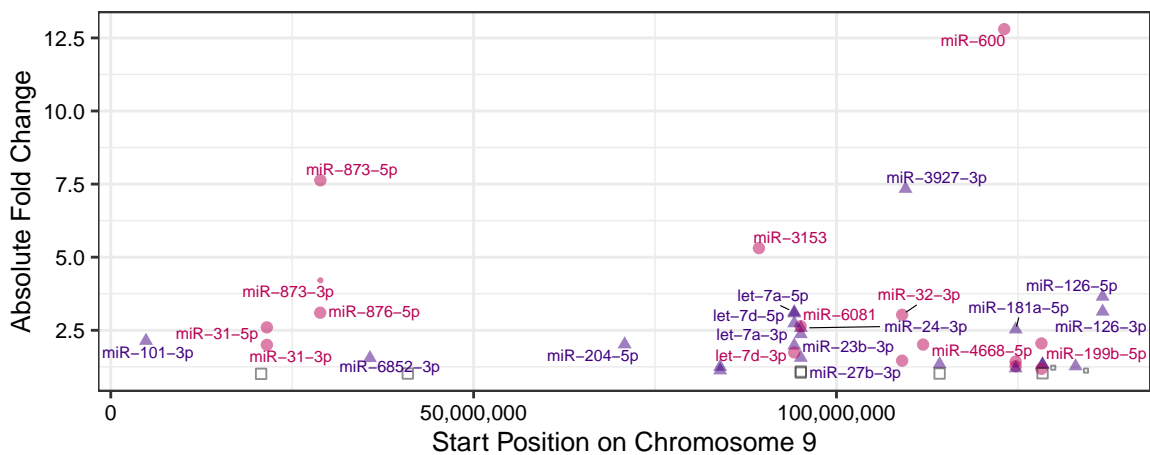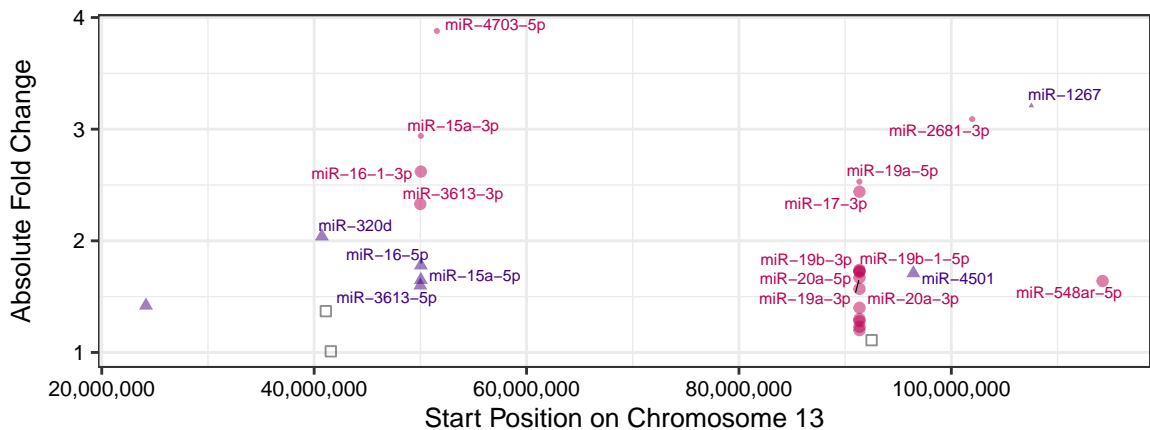

Upregulated ● First Trimester, ▲ Third Trimester, □ Not Significant

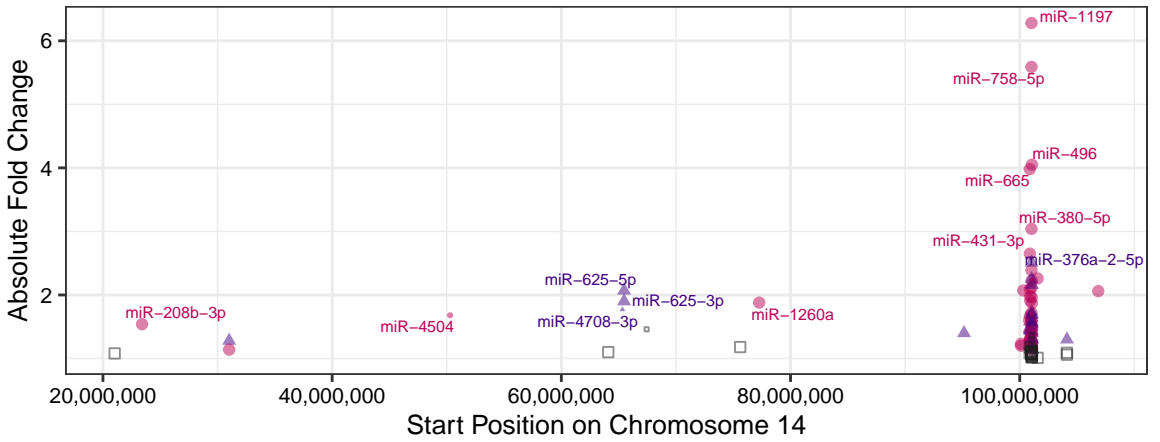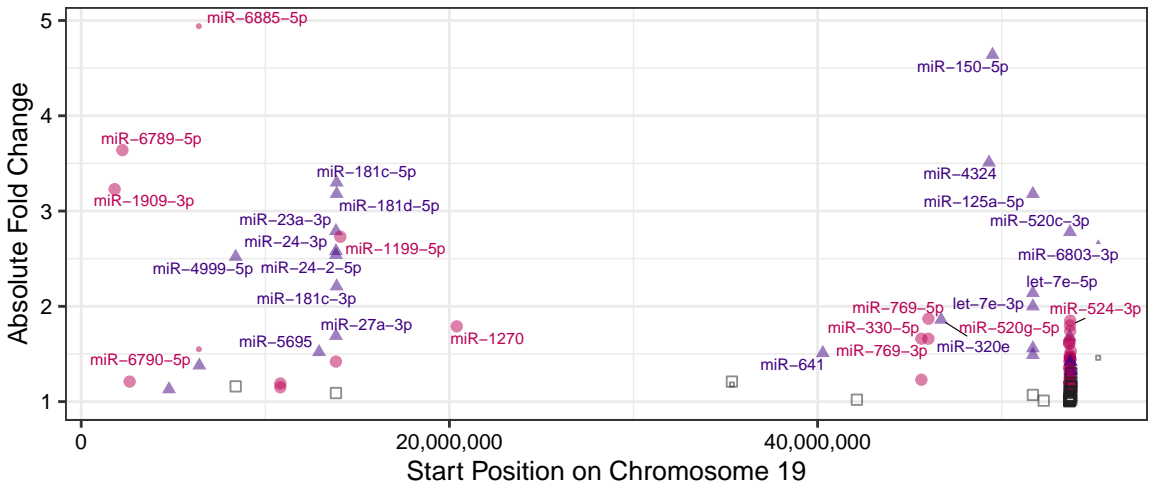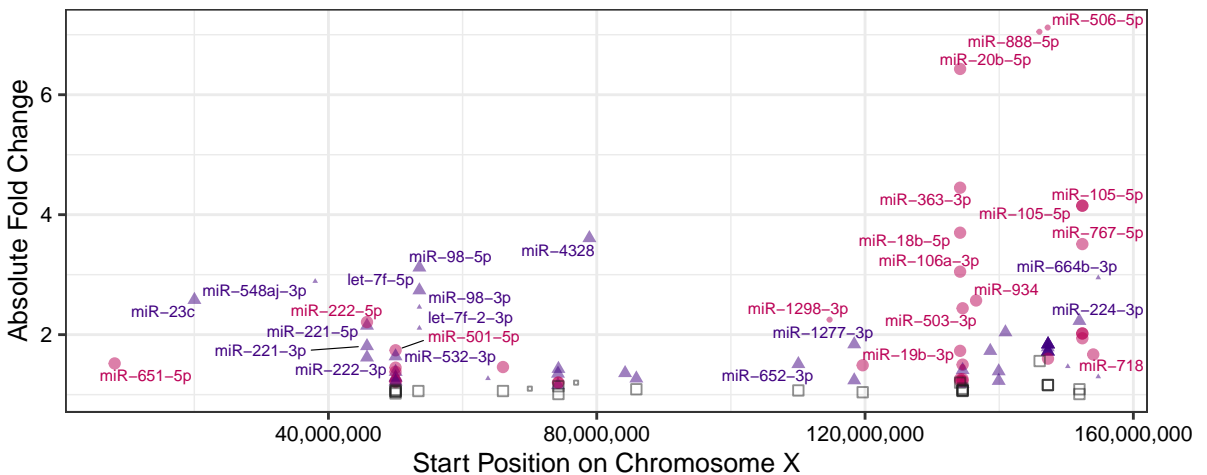

Supplement: epi-13-995-s5.pdf [file epi-13-995-s5.pdf]
