# Supplementary material
Source: PubMed Central journal article supplement (PMC8244582)

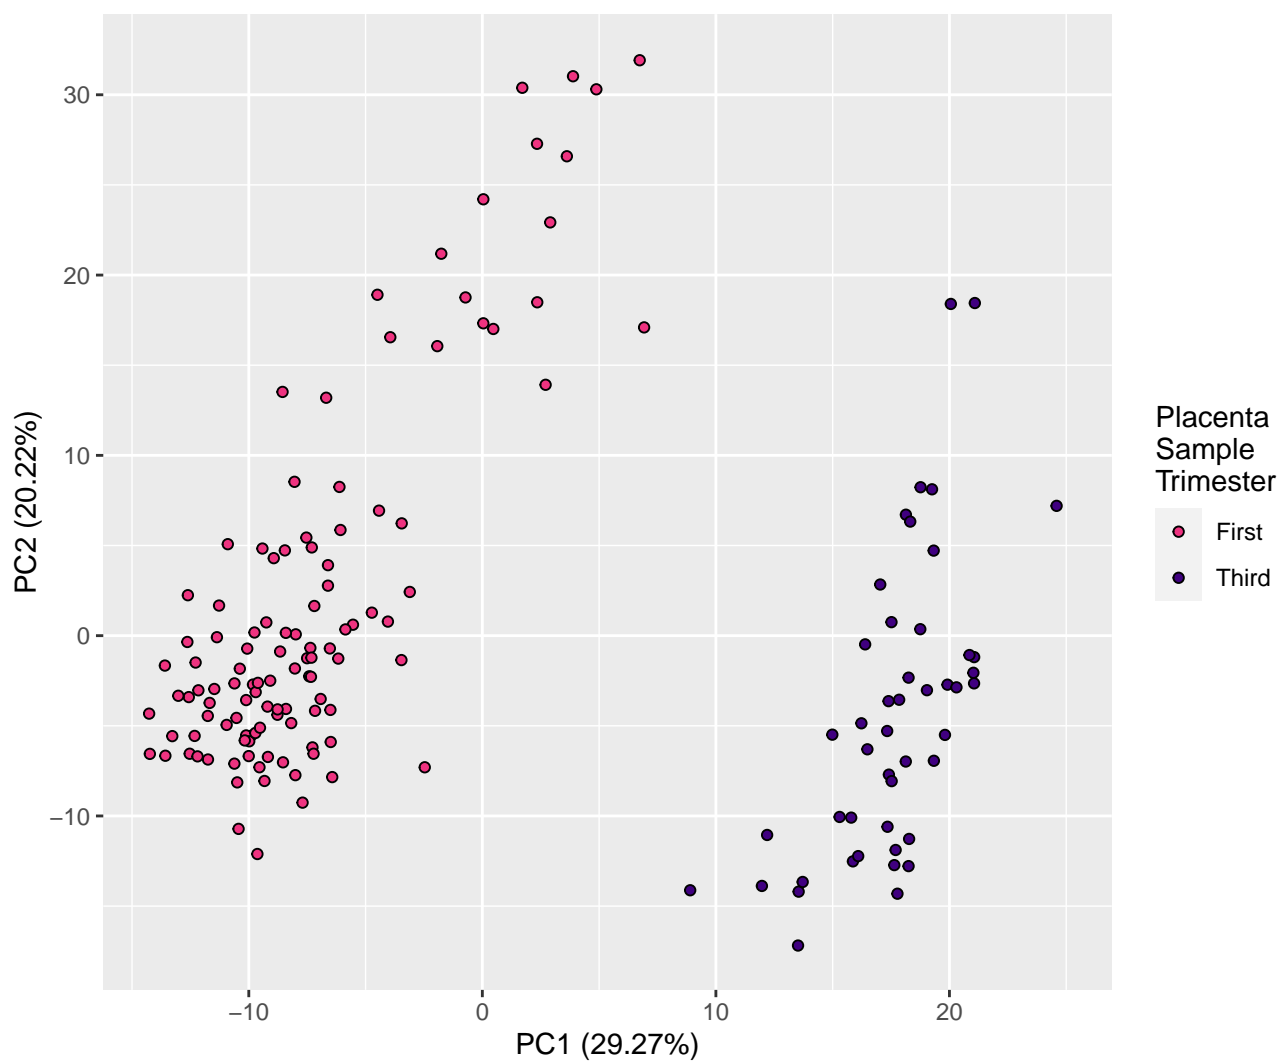

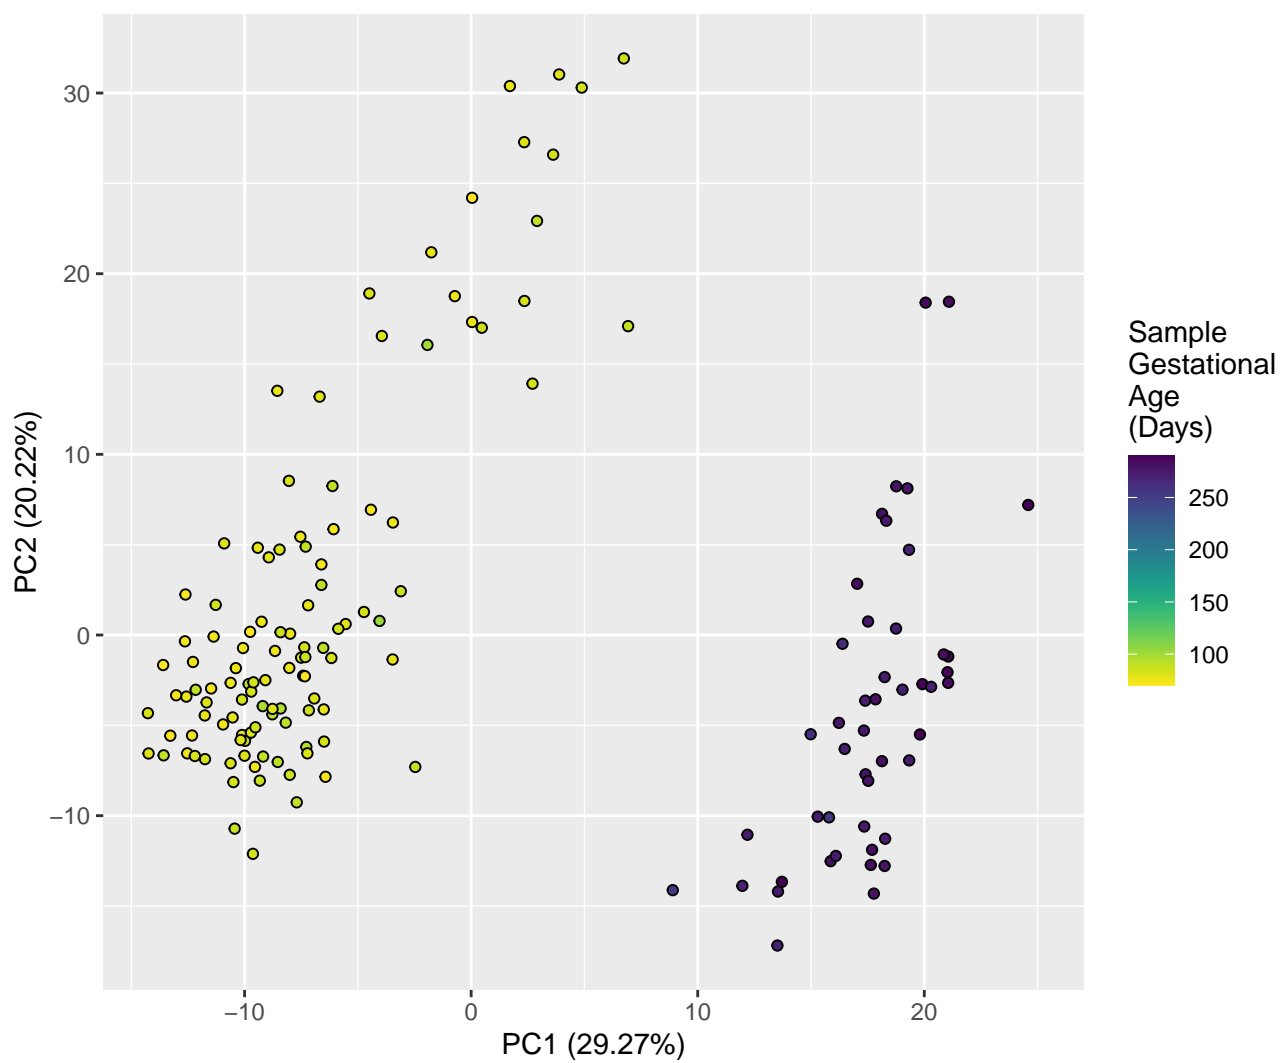

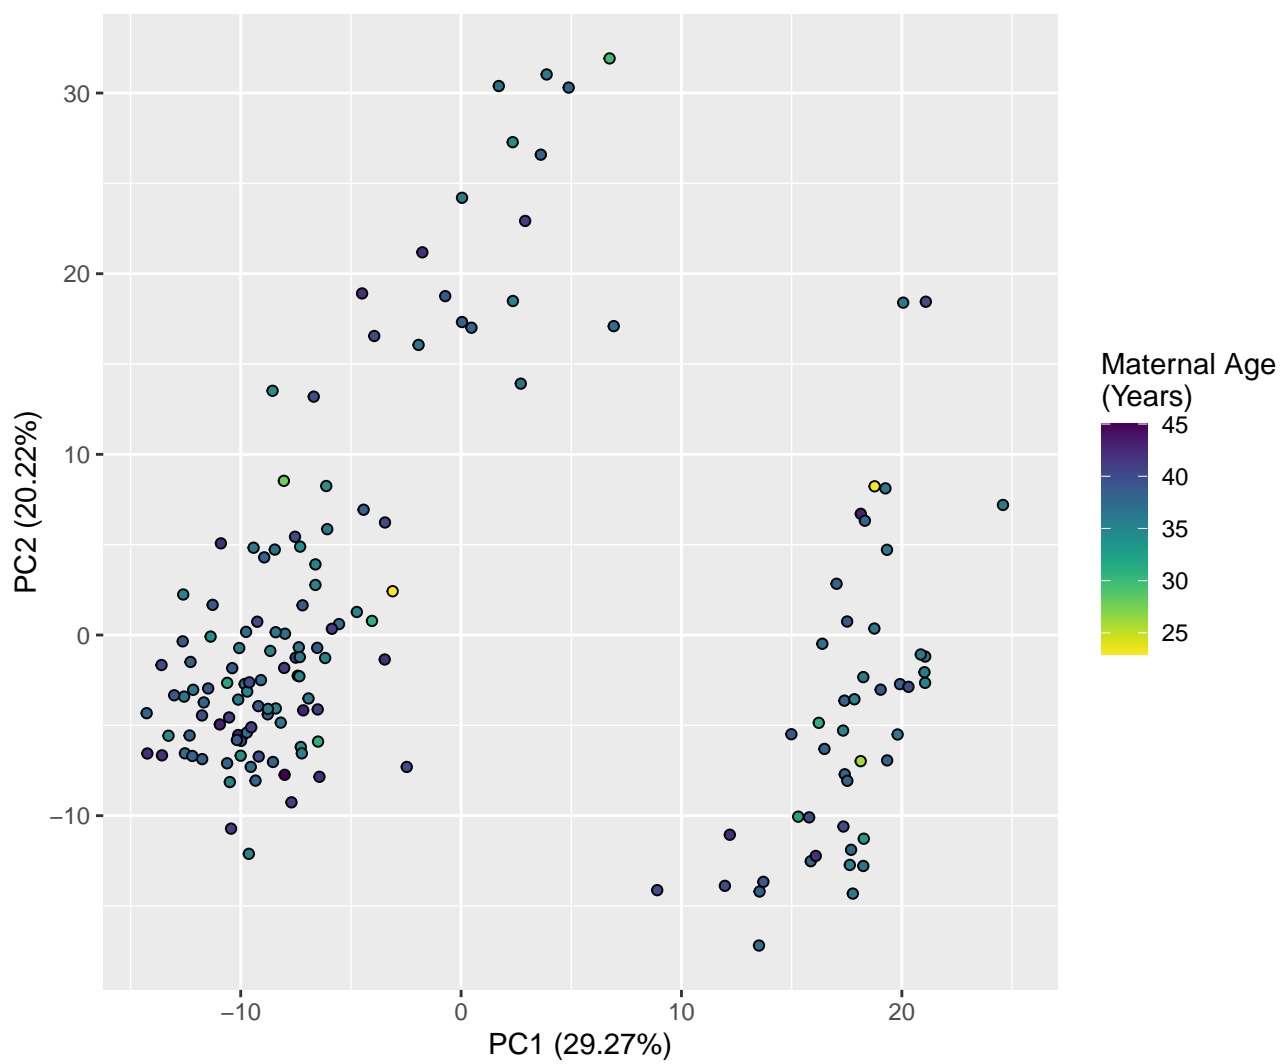

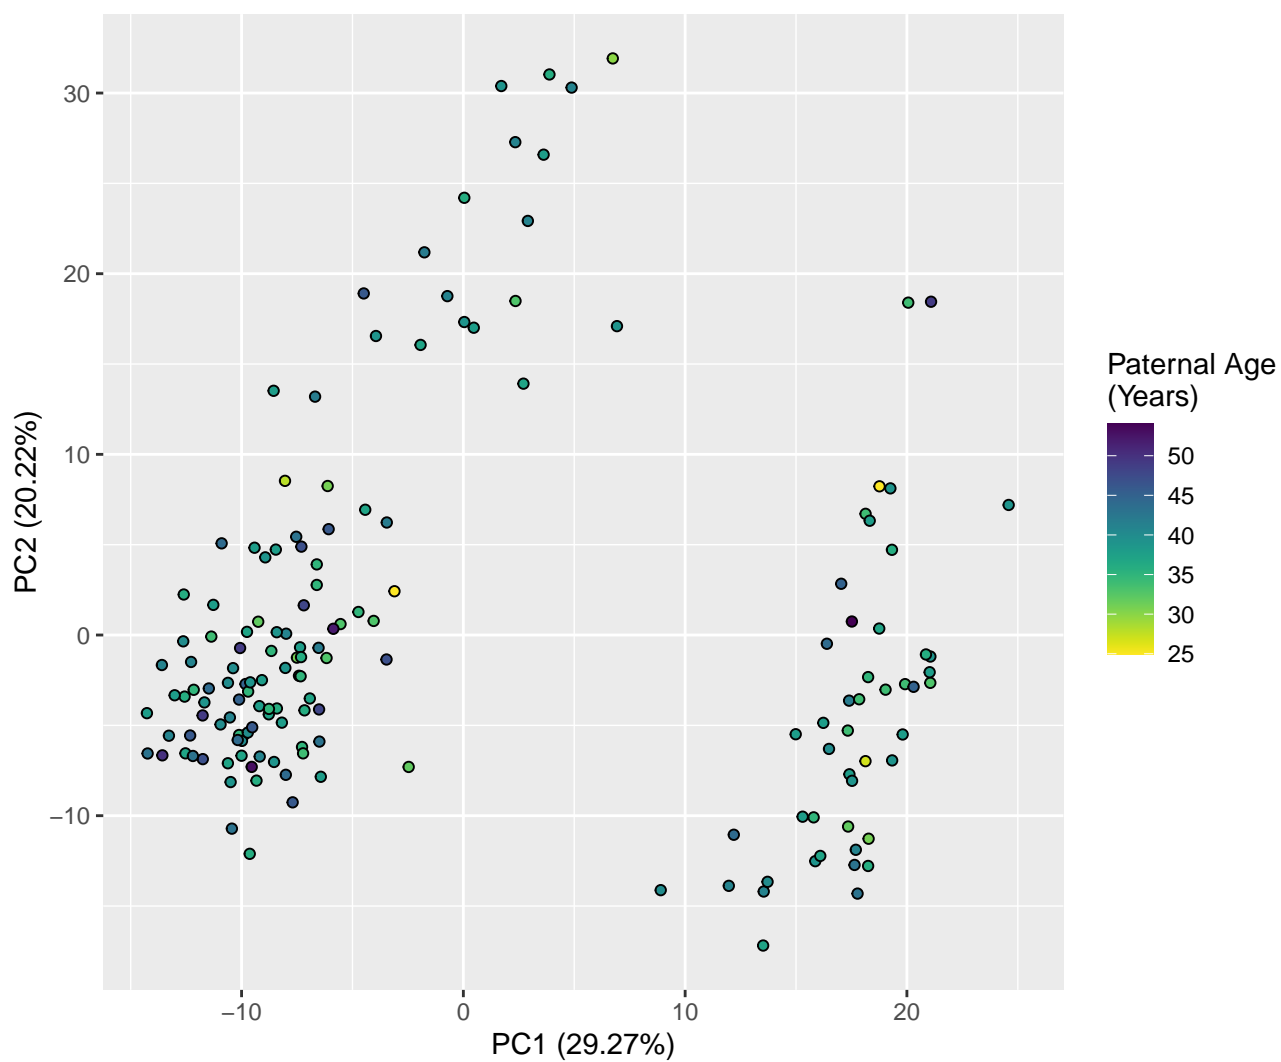

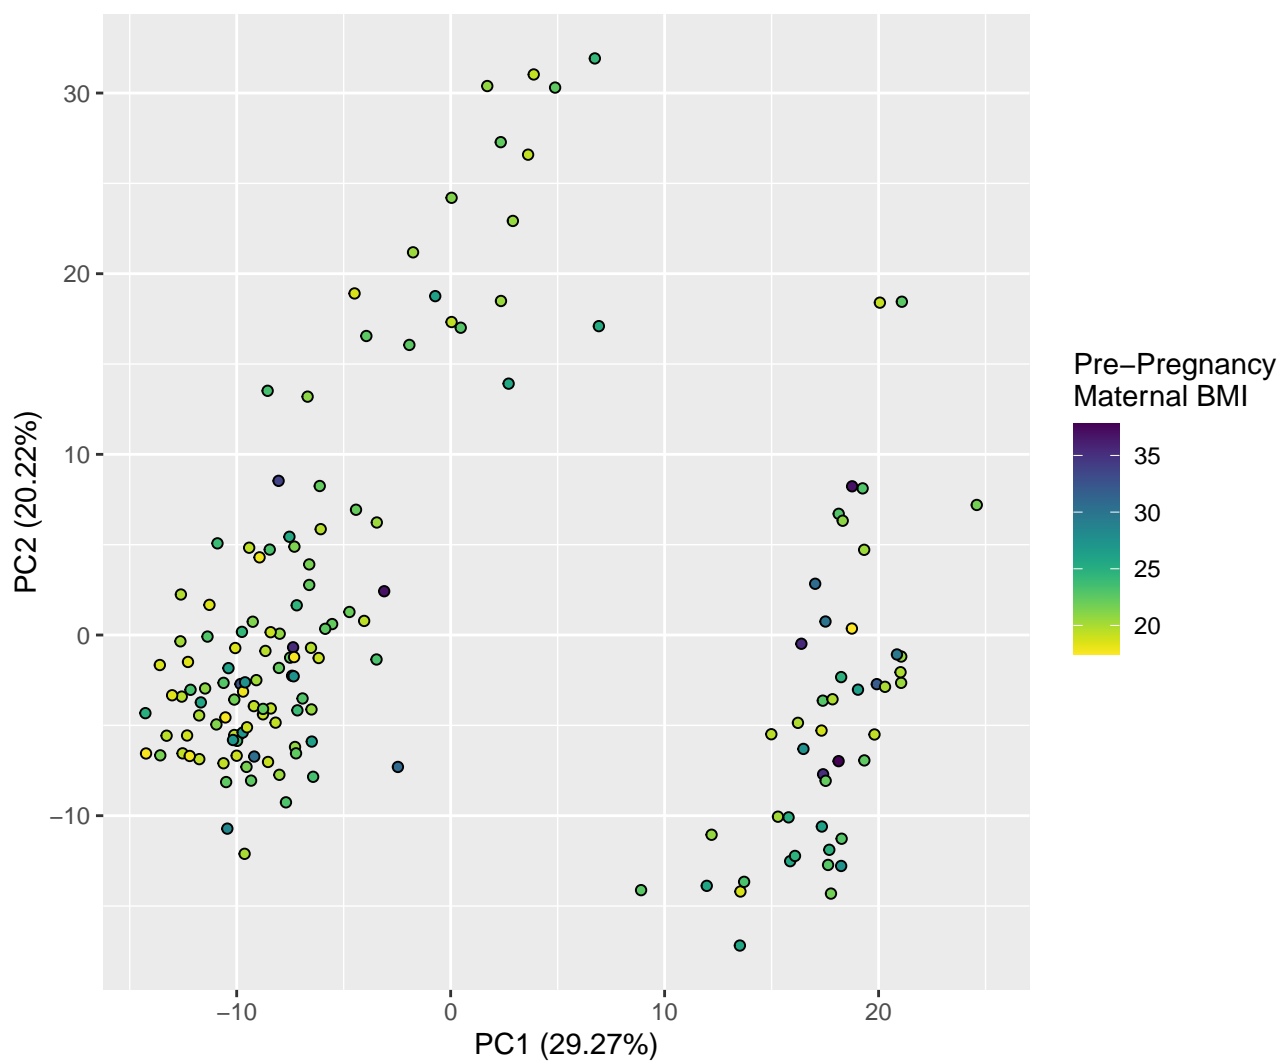

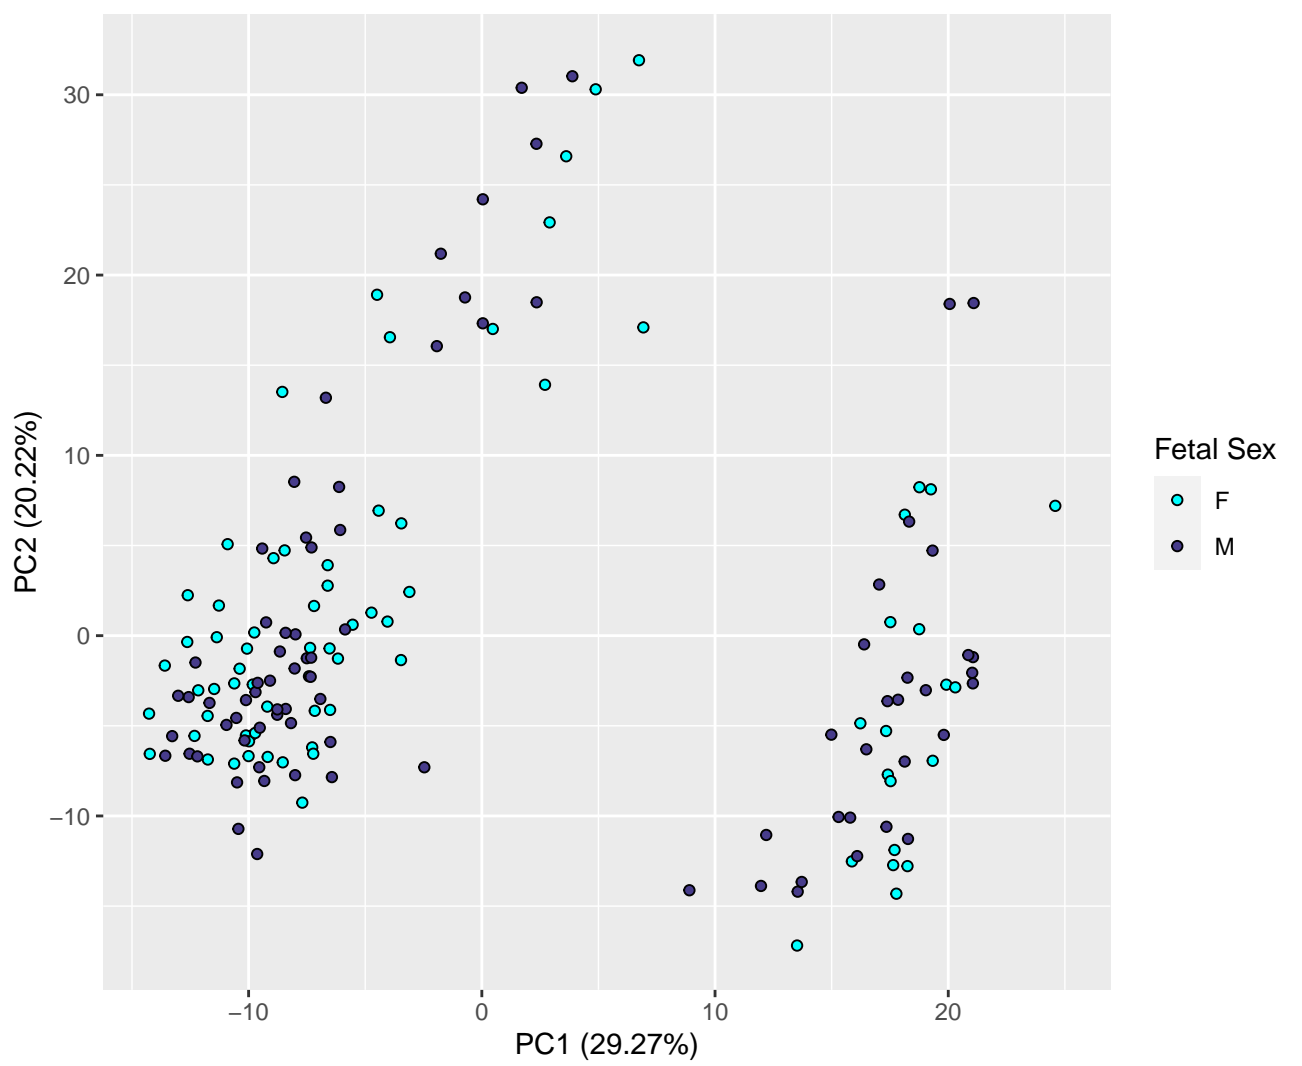

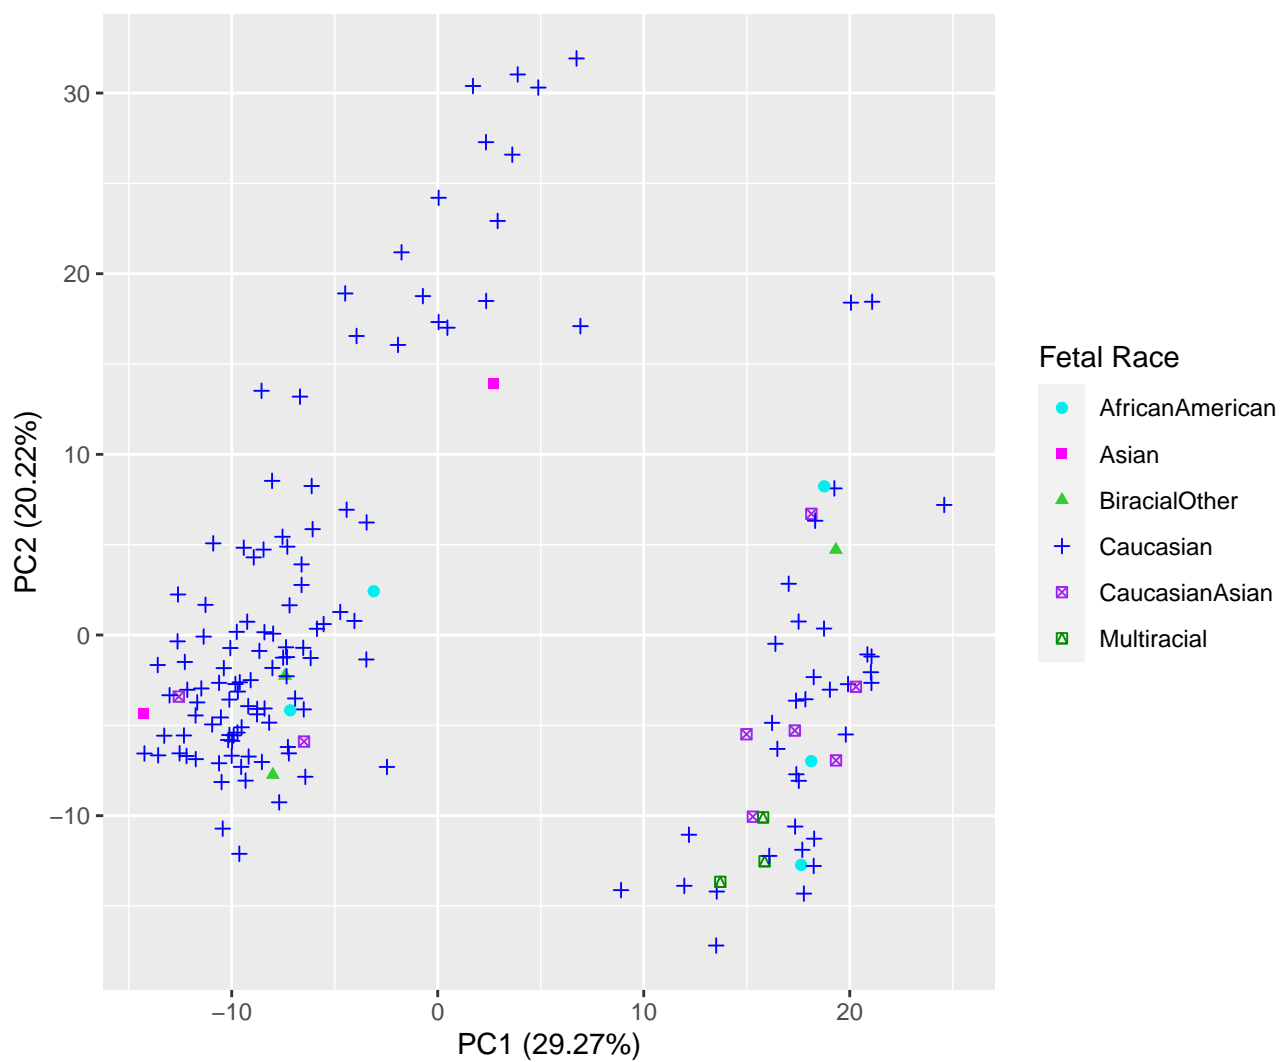



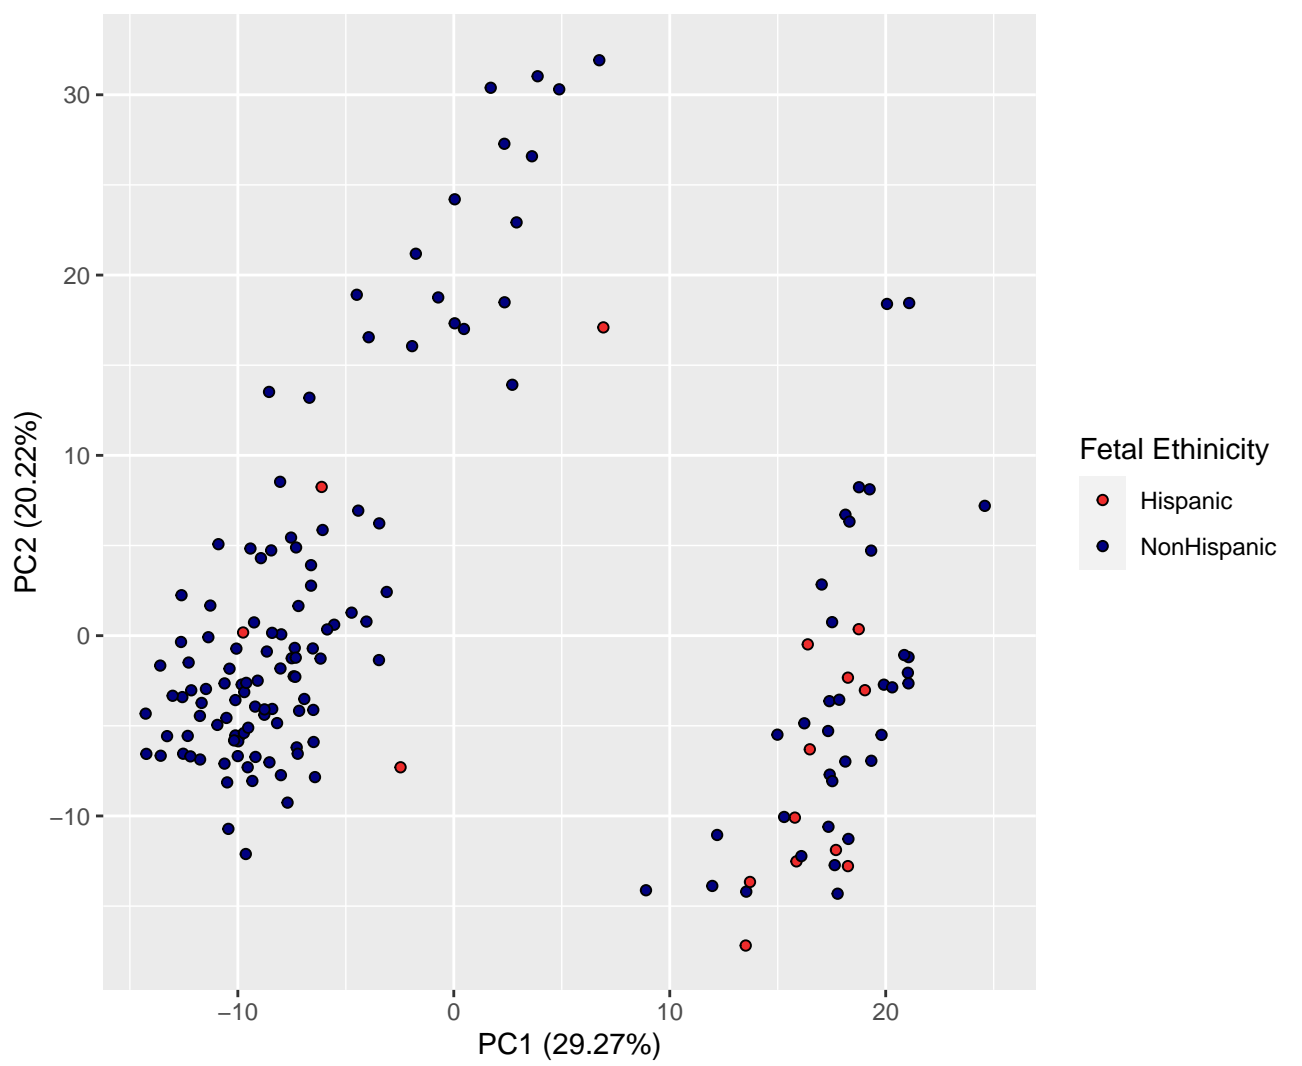

Supplement: epi-13-995-s1.pdf [file epi-13-995-s1.pdf]
